# Supplementary material for: Different morphologies on Cu–Ce/TiO2 catalysts for the selective catalytic reduction of NOx with NH3 and DRIFTS study on sol–gel nanoparticles
Source: Royal Society of Chemistry journal article supplement (doi:10.1039/d3ra03018k), 2023-01-01
Supplement: d3ra03018k1.pdf [file d3ra03018k1.pdf]

## Supporting information

# Different morphologies on Cu-Ce/TiO<sub>2</sub> catalysts for selective catalytic reduction of NO<sub>x</sub> with NH<sub>3</sub> and DFIFTS study on sol-gel nanoparticle

## 1. Catalytic activities

The effects of H<sub>2</sub>O and SO<sub>2</sub> on the NO<sub>x</sub> conversion over the catalysts at 310 °C were illustrated in Fig. S1. The catalytic activity of all catalysts decreased in the presence of H<sub>2</sub>O and SO<sub>2</sub>. Specifically, the deposition of (NH<sub>4</sub>)<sub>2</sub>SO<sub>4</sub>/NH<sub>4</sub>HSO<sub>4</sub> and metal sulfates were formed, which were caused by the existence of H<sub>2</sub>O and SO<sub>2</sub>, thereby resulting in deactivation of catalysts<sup>1-3</sup>. After removing H<sub>2</sub>O and SO<sub>2</sub>, the NO<sub>x</sub> conversions over all catalysts had a slight increase. It was confirmed that unstable NH<sub>4</sub>HSO<sub>4</sub> on the catalyst surface might decompose after stopping SO<sub>2</sub> and H<sub>2</sub>O<sup>1-3</sup>.

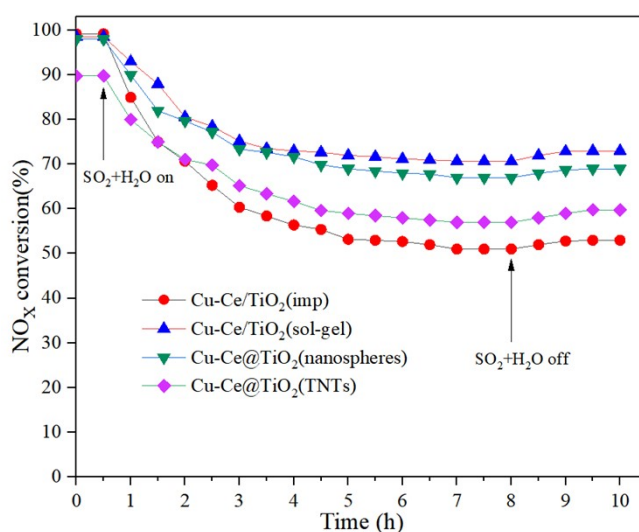

Fig. S1. SO<sub>2</sub> and H<sub>2</sub>O tolerance of all catalysts. Reaction conditions: 500 ppm NO, NO/NH<sub>3</sub>:1, 7.5 % O<sub>2</sub>, 200 ppm SO<sub>2</sub>, 5 % H<sub>2</sub>O and N<sub>2</sub> in balance, GHSV = 24000 h<sup>-1</sup>.

## 2. NH<sub>3</sub>-SCR kinetic tests

During the gas-solid phase catalytic reaction, two transport phenomena need pondering: (1) Gas film diffusion involves diffusion of reactants from the main body gas phase to the surface of the catalyst pellets, and is indeed an important factor that influences the performance of tube wall, monolith, and plate-shape integrated catalytic reactors. (2) Pore diffusion or intracrystalline diffusion involves diffusion of the reactants within the pores of the catalyst particles, where the reaction takes place simultaneously

The potential impact of mass transfer limitations from the film diffusion on the catalysts was firstly ruled out. The reaction rates were compared over the Cu-Ce/TiO<sub>2</sub> (sol-gel) samples with varying pellet sizes (40-60, 60-80 and 80-100 mesh) and total flow rate (1.0 1.2, 1.4 and 1.6 L/min) while remaining the same contact time at 120 °C. As shown in Fig. S2 a-b, when the total flow rate was more than 1.4 L/min, the NO<sub>x</sub> conversion rates were stable. In addition, the NO<sub>x</sub> conversion rates were unchanged when the pellet size of the catalyst was smaller than 60-80 mesh (Fig. 2b). These results suggested that the mass transfer limitations of the catalysts pellets from film diffusion resistance could be ruled out under this condition as: 1.6 L/min flow rate, 60-80 mesh, 100-120 °C.

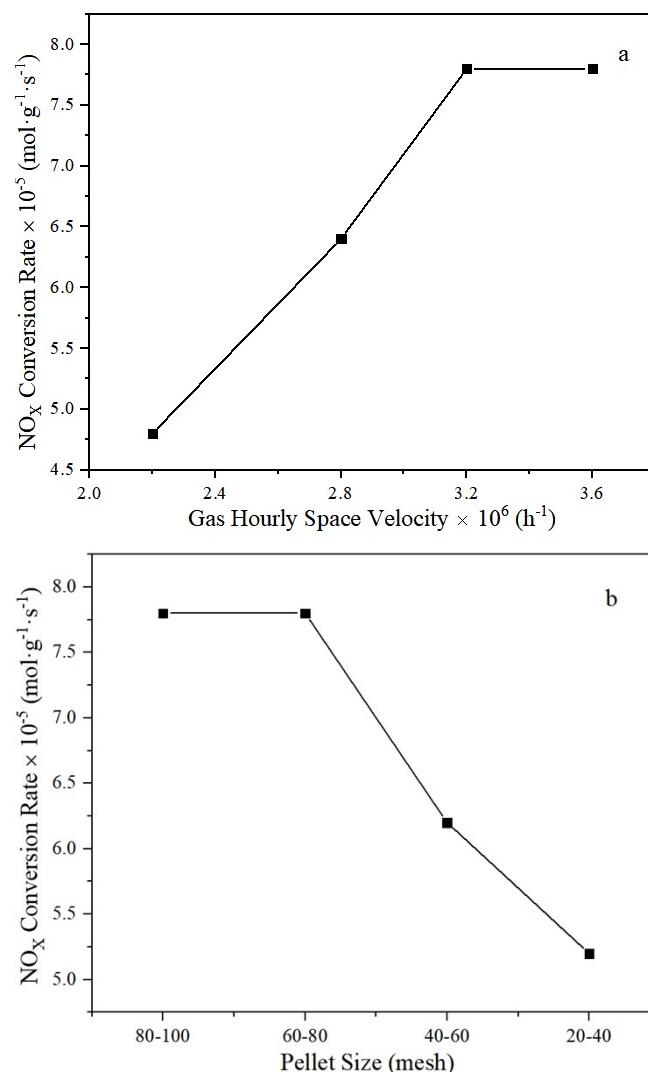

Fig. S2. The potential effects of film diffusion control when changing (a) the flow rate of catalyst and (b) catalyst pellets size for the NO<sub>x</sub> reduction activity over Cu-Ce/TiO<sub>2</sub> (sol-gel) at 120 °C;

### 3. Raman test

The crystal structure of all catalysts was further studied by Raman spectroscopy. As shown in Fig. S3, the typical anatase phase bands of Cu-Ce/TiO<sub>2</sub>(sol-gel) and Cu-Ce@TiO<sub>2</sub>(nanosphere) appear at 143, 395, 515 and 638 cm<sup>-1</sup> 4-6. This confirmed that CeO<sub>2</sub> and CuO were wrapped by TiO<sub>2</sub> on Cu-Ce@TiO<sub>2</sub>(nanospheres), and high dispersibility and amorphous phase of CuO and CeO<sub>2</sub> on Cu-Ce/TiO<sub>2</sub> (sol-gel). Many

researchers have reported that bands at 442 and 607  $\text{cm}^{-1}$  were attributed to  $\text{CeO}_2$  and  $\text{CuO}$ , respectively. In addition, the Raman relative intensity of  $\text{Cu-Ce/TiO}_2$  (sol-gel) was higher than that of other catalysts. It indicated that  $\text{CeO}_2$  and  $\text{CuO}$  might interact with oxygen vacancies of  $\text{Ti-O-Ti}$  structure over  $\text{TiO}_2$  and this interaction recovered part of  $\text{Ti-O-Ti}$  with Raman symmetric vibration <sup>7</sup>.

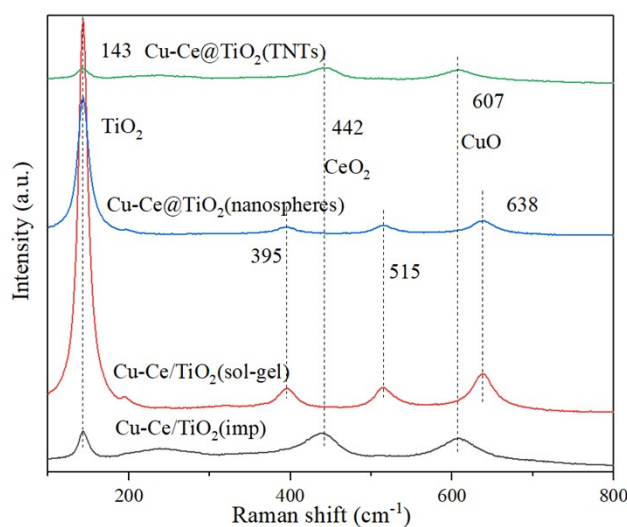

Fig. S3. Raman spectra of all catalyst.

Table S1 Specific catalyst surface area and pore parameters

| Catalysts                               | $S_{\text{BET}}$<br>( $\text{m}^2/\text{g}$ ) | $S_{\text{meso}}$<br>( $\text{m}^2/\text{g}$ ) | $V_{\text{Pore}}$<br>( $\text{cm}^3/\text{g}$ ) | $V_{\text{meso}}$<br>( $\text{cm}^3/\text{g}$ ) | Average Pore<br>Diameter (nm) |
|-----------------------------------------|-----------------------------------------------|------------------------------------------------|-------------------------------------------------|-------------------------------------------------|-------------------------------|
| $\text{Cu-Ce/TiO}_2(\text{imp})$        | 45.37                                         | -                                              | 0.32                                            | -                                               | 28.59                         |
| $\text{Cu-Ce/TiO}_2(\text{sol-gel})$    | 119.12                                        | 118.52                                         | 0.36                                            | 0.34                                            | 12.32                         |
| $\text{CuCe@TiO}_2(\text{nanospheres})$ | 109.65                                        | 108.99                                         | 0.29                                            | 0.28                                            | 10.69                         |
| $\text{Cu-Ce@TiO}_2(\text{TNTs})$       | 82.44                                         | -                                              | 0.32                                            | -                                               | 15.54                         |

Table S2 The crystalline sizes (D) and lattice sizes (d) of TiO<sub>2</sub> CuO and CeO<sub>2</sub> in different catalysts.

| Catalysts                               | anatase (101) |       | rutile (110) |       | CeO <sub>2</sub> |           | CuO (110) |       |
|-----------------------------------------|---------------|-------|--------------|-------|------------------|-----------|-----------|-------|
|                                         | D (nm)        | d (Å) | D (nm)       | d (Å) | D(nm)            | d (Å)     | D (nm)    | d (Å) |
| Cu-Ce/TiO <sub>2</sub> (imp)            | 19.6          | 3.5   | 22.2         | 3.2   | 30.4             | 1.9 (220) | 29.2      | 2.4   |
| Cu-Ce/TiO <sub>2</sub><br>(sol-gel)     | 7.7           | 3.5   | -            | -     | -                | -         | -         | -     |
| Cu-Ce@TiO <sub>2</sub><br>(nanospheres) | 6.6           | 3.5   | -            | -     | -                | -         | -         | -     |
| Cu-Ce@TiO <sub>2</sub> (TNTs)           | 9.4           | 3.5   | 20.3         | 3.2   | 14.5             | 2.5 (111) | 18.5      | 2.4   |

Table S3 Acidity of catalysts obtained from NH<sub>3</sub>-TPD.

| catalyst                                | Acidity (mmol/g) |          |        | Amount<br>(mmol/g) |
|-----------------------------------------|------------------|----------|--------|--------------------|
|                                         | Weak             | Moderate | Strong |                    |
| Cu/TiO <sub>2</sub> (sol-gel)           | 0.0875           | -        | 0.1239 | 0.2114             |
| Ce/TiO <sub>2</sub> (sol-gel)           | 0.1456           | -        | 0.2941 | 0.4397             |
| Cu-Ce/TiO <sub>2</sub> (imp)            | 0.0461           | 0.1916   | 0.0562 | 0.2939             |
| Cu-Ce/TiO <sub>2</sub> (sol-gel)        | 0.2259           | 0.3728   | 0.0459 | 0.6446             |
| Cu-Ce@TiO <sub>2</sub><br>(nanospheres) | 0.1113           | 0.2429   | 0.2087 | 0.5629             |
| Cu-Ce@TiO <sub>2</sub> (TNTs)           | 0.1643           | -        | -      | 0.1643             |

Table S4 The result of the atomic surface composition of the catalyst.

| Catalysts                               | Atomic composition (%) |      |       |       | Relative atomic (%) |                 |                  |                  |                |                |
|-----------------------------------------|------------------------|------|-------|-------|---------------------|-----------------|------------------|------------------|----------------|----------------|
|                                         | Cu                     | Ce   | Ti    | O     | Cu                  |                 | Ce               |                  | O              |                |
|                                         |                        |      |       |       | Cu <sup>2+</sup>    | Cu <sup>+</sup> | Ce <sup>4+</sup> | Ce <sup>3+</sup> | O <sub>α</sub> | O <sub>β</sub> |
| Cu-Ce/TiO <sub>2</sub> (imp)            | 1.19                   | 1.87 | 22.36 | 58.58 | 77.04               | 22.96           | 78.35            | 21.65            | 75.51          | 24.49          |
| Cu-Ce/TiO <sub>2</sub><br>(sol-gel)     | 1.39                   | 2.11 | 20.47 | 56.89 | 88.05               | 11.95           | 82.14            | 17.86            | 63.56          | 36.44          |
| Cu-Ce@TiO <sub>2</sub><br>(nanospheres) | 1.15                   | 0.75 | 23.44 | 59.85 | 79.33               | 20.67           | 67.26            | 33.74            | 71.40          | 28.60          |
| Cu-Ce@TiO <sub>2</sub><br>(TNTs)        | 1.17                   | 0.91 | 23.52 | 61.33 | 65.88               | 34.12           | 79.15            | 20.85            | 84.60          | 15.40          |

Table S5. The quantity of acid sites over catalysts at 200 °C, 250 °C and 300 °C (μmol/g).

| Samples                             | Py-IR 200 °C (μmol/g) |       |       |     | Py-IR 250 °C (μmol/g) |       |       |     | Py-IR 300 °C (μmol/g) |       |       |     |
|-------------------------------------|-----------------------|-------|-------|-----|-----------------------|-------|-------|-----|-----------------------|-------|-------|-----|
|                                     | Bronsted              | Lewis | Total | B/L | Bronsted              | Lewis | Total | B/L | Bronsted              | Lewis | Total | B/L |
| Cu/TiO <sub>2</sub><br>(sol-gel)    | 1.6                   | 17.9  | 19.5  | 0.1 | 1.1                   | 10.6  | 11.7  | 0.1 | 0.6                   | 6.5   | 7.1   | 0.1 |
| Ce/TiO <sub>2</sub><br>(sol-gel)    | 1.5                   | 18.7  | 20.2  | 0.1 | 0.9                   | 8.6   | 9.5   | 0.1 | 0.5                   | 4.6   | 5.1   | 0.1 |
| Cu-Ce/TiO <sub>2</sub><br>(sol-gel) | 7.4                   | 20.8  | 28.2  | 0.4 | 4.9                   | 11.4  | 16.3  | 0.4 | 3.4                   | 7.2   | 10.6  | 0.5 |

## Reference

- Z. Zhang, Y. Li, P. Yang, Y. Li, C. Zhao, R. Li and Y. Zhu, *Fuel*, 2021, **303**.
- Z. Yang, H. Li, X. Liu, P. Li, J. Yang, P. Lee and K. Shih, *Fuel*, 2018, **227**, 79-88.
- X. Du, X. Gao, L. Cui, Y. Fu, Z. Luo and K. Cen, *Fuel*, 2012, **92**, 49-55.
- A. Gurbani, J. L. Ayastuy, M. P. Gonzalez-Marcos and M. A. Gutierrez-Ortiz, *Int. J. Hydrogen Energy*, 2010, **35**, 11582-11590.
- A. Gurbani, J. L. Ayastuy, M. P. Gonzalez-Marcos, J. E. Herrero, J. M. Guil and M. A. Gutierrez-Ortiz, *Int. J. Hydrogen Energy*, 2009, **34**, 547-553.
- Z. Sheng, D. Ma, D. Yu, X. Xiao, B. Huang, L. Yang and S. Wang, *Chin. J. Catal.*, 2018, **39**, 821-830.
- Y. Zeng, S. Zhang, Y. Wang and Q. Zhong, *J. Colloid Interface Sci.*, 2017, **496**, 487-495.
